# Supplementary material
Source: publisher figshare collection journal article supplement (https://gsajournals.figshare.com/ndownloader/files/18059183)
Supplement: Supplementary file 1 [file 18059183]

**Figure S3. Fosmid pool assembly pipeline flowchart**
